# Supplementary material
Source: Research Square preprint supplement (doi:10.21203/rs.3.rs-8794160/v1)
Supplement: Supplementary file 1 [file 847e181f678357fb8f8445a4.docx]

**Supplementary Material**

**Figure S1:** AGES session structure

5 mins buffer

5 mins buffer

CBT Discussion

15 min

***Exercise intervention***

***20 minutes***

CBT Discussion

15 min

**Table S1:** Summary of session topics

| **Session 1 : Introduction** | Overview of program objectives; Psychoeducation of fear of falling; Exercise introduction ; Homework - Goal setting and daily exercise |
| --- | --- |
| **Session 2: Exploring Emotions of Falling** | Review of previous session and homework ; Psychoeducation on emotions related to fear of falling ; Exercise and reflection on feelings ; Homework - Document situations and emotions |
| **Session 3: Exploring Automatic Thoughts** | Psychoeducation about Identifying and discussing automatic thoughts ; Exercise and reflection on thoughts ; Homework - Record situations and automatic thoughts |
| **Session 4: Exploring Safety Behavior** | Discussion on behaviors related to fear of falling ; Identifying safety behaviors ; Exercise and reflection on behaviors ; Homework - Document situations, thoughts, and behaviors |
| **Session 5: Exploring Assumptions I** | Review of assumptions behind automatic thoughts ; Identifying maladaptive assumptions ; Exercise and reflection on assumptions ; Homework - Record situations and challenge assumptions |
| **Session 6: Exploring Assumptions II** | Continuation of assumption exploration ; Formulating alternative assumptions ; Exercise and reflection on new assumptions ; Homework - Document situations with new assumptions |
| **Session 7: Reviewing Goals** | Review and discussion of personal goals ; Evaluating progress towards goals ; Exercise and reflection on goal achievement ; Homework - Continue goal setting and exercise |
| **Session 8: Being One's Therapist** | Concluding discussion on self-therapy ; Reflection on the course and its impact ; Final exercise session ; Completion of follow-up questionnaires |

**Table S2:** Measures used and their descriptions

| **Measure** | **Description** |
| --- | --- |
| *Falls Efficacy Scale-International* (FES-I) (42) | The FES-I is a self-reported measure to assess the level of concern individuals have about falling during various activities of daily living, helping to gauge the psychological impact of FoF. It consists of 16 items, with scores ranging from 1 (not at all concerned) to 4 (very concerned). This scale was selected as it is a commonly used measure of FoF. |
| *World Health Organisation-5 Well-Being Index* (WHO-5) (43). | The is a short, generic global rating scale measuring subjective well- It consists of five items, rated from 0 (not present) to 5 (constantly present), with total score transforted into a percentage from 0 to 100. Higher scores indicate better well-being. The items address positive mood, vitality, and general interests. This measure was selected as it is a commonly used measure and offers high validity and requires little time for completion (44). |
| *Timed Up and Go* (TUG) (45). | The test evaluates a person’s mobility, balance, walking ability, and risk of falling. The TUG measures the time required to rise from a chair, walk three meters, turn around, walk back to the chair, and sit down. Times greater than 12 seconds are generally indicative of a higher risk of falling (46). This measure was selected, due to its simplicity, rapidity, and commonality of use, allowing to assess for frailty and risk of falling. |
| *Gait analysis* (37). | Gait analysis involves the assessment of an individual’s walking pattern to identify abnormalities and potential fall risks. FoF is associated with slower gait speed, shorter stride length, longer double support time, and in co-occurance of a history of falls, increased variability of stride length (15). Identification of FoF through gait analysis can help determine FoF indirectly, and in particular for individuals who have difficulty expressing themselves. For purposes of this study, a Lidar-Based Method to Conduct Contactless Assessments of Gait Parameters was developed and validated (37). To compute gait parameters, the extracted leg positions were used to calculate velocity profiles for both legs. |

**Table S3:** Comparison between «A Matter of Balance: Managing Concerns about Falls. Volunteer Lay Leader Model» von MaineHealth (USA)[[1]](#footnote-1) and AGES

| **Concept comparison** | **A Matter of Balance (USA)** | ***Aktiv gegen Sturzangst* (AGES)** |
| --- | --- | --- |
| Starting point | - Since 2003 - Evidence based | - Piloted between 2021 bis 2023 |
| Training concept | - Lead Trainers trained by Master-Trainers - Master trainers (specialists and guest health care professionals) train coaches (8h) with the ‘Master Trainer Manual’ - Coaches (Lay Leaders) attend annual refresher courses for (license renewal) | - Experts in the fields of medicine and exercise train course leaders (8h) |
| Course leaders | - Laymen | - Nursing professionals - Nursing assistants - Activation therapists - “Socio-cultural animators” - Physiotherapists - Occupational therapists - Psychotherapists - Movement therapists |
| Course setting | - Community centers | - Assisted living facilities |
| Infrastructure and course material | - Course room - Tables, chairs, flipchart - DVD recorder - Name badges - Attendance list - Handouts - Snacks, drinks - Final diploma | - Course room/hall - Chairs - Manual for course leaders - Manual for course participants |
| Course duration | - 1 month, 2x per week, 2 hours each or - 2 months, 1x per week | - 2 Months |
| Number of lessons | - 8 Lessons | - 8 group lessons with 1 lesson per week of 60 minutes each (lesson 1 and lesson 8 take longer) |
| Cost to participants | - Depending on the community | - Supported by the assisted living facilities as part of their regular services |
| Course objectives | - *I am more comfortable talking about fear of falling.* - *I feel comfortable increasing activity.* - *I plan to continue exercising.* - *I would recommend A Matter of Balance.* | - Reduction and prevention of fear of falling among course participants through cognitive behavioural therapy (CBT), to change attitudes and behaviour regarding fear of falling, in combination with balance and strength training in the form of physical exercises, to prevent falls. |
| Target groups | - Inactive older people living at home with a fear of falling - Prior falls - 60+ | - Residents of or people living at home who use services from assisted living facilities - Older, inactive people with and without a fear of falling - People with and without previous falls - Non-frail people and people with an increased risk of developing frailty (‘pre-frail’; e.g. using a rollator) - Intact cognition or at most mild cognitive impairment - People in wheelchairs are not included - No age requirements. |
| Group sizes | - 8 to 14 participants | - 5 to 15 participants |
| Lesson breakdown | - Total 120 minutes   - 5' Welcome   - 25' Exercises   - 40' CBT   - 10' Break   - 35' CBT   - 5' Conclusion | - Total 50-60 Minuten   - 5’ Welcome   - 15’ CBT (Part A)   - 20’ Exercise component   - 15’ CBT (Part B)   - 5-10' Conclusion |
| CBT approach | - Imparting knowledge - Strengthen self-management skills - Guided group discussions - Self-reflection - Exchange of experience - Create everyday relevance - Discuss case studies - Role play (everyday examples) - Question and answer sessions - Homework - Document your own learning and feelings in writing | - Imparting knowledge - Strengthen self-management skills - Guided group discussions - Aelf-reflection - Exchange of experience - Create everyday relevance - Discuss case studies - Role play (everyday examples) - Question and answer sessions - Homework - Document your own learning and feelings in writing |
| CBT content | - Pos/neg thougts - Home Hazards - Assertiveness - Personal Action Planner - Confidence Building - Fall-ty Habits - Env. Hazard - Talking about Fear of Falling - Teamwork | - Module 1: introduction and two questionnaires - Module 2: Exploring feelings - Module 3: Automatic thoughts - the things we tell ourselves - Module 4: Exploring safety behaviour - Module 5: Exploring assumptions about falling - Module 6: Exploring assumptions about falling - alternative assumptions - Module 7: Reviewing goals - Module: 8: Being your own therapist |
| Choice of exercises | - Basic individual exercises - Same 29 standard exercises (sitting and standing) for each lesson | - Basic individual exercises - Advanced exercises (sitting, standing and walking) - 8 exercises per lesson |

1. Reference: <https://www.mainehealth.org/healthy-communities/healthy-aging/matter-of-balance> (Last accessed on: 15.05.2023) [↑](#footnote-ref-1)
